# Supplementary material for: Hypergolics in Carbon Nanomaterials Synthesis: New Paradigms and Perspectives
Source: MDPI journal article supplement (doi:10.3390/molecules25092207), 2020-05-08
Supplement: s1 [file s1]

## Supplementary.

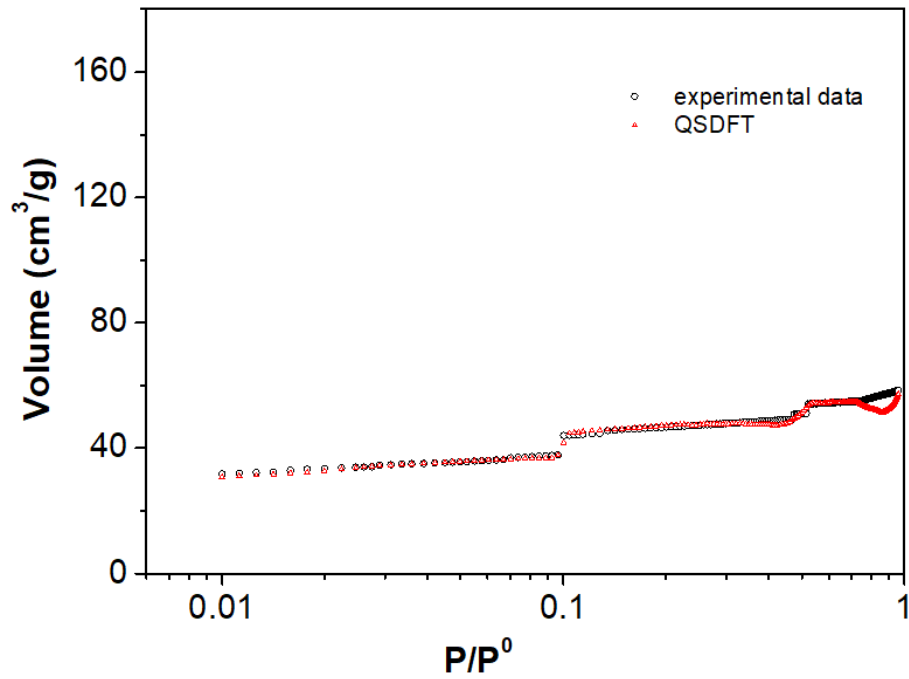

**Figure 1.** Fitting comparison between experimental data of carbon nanosheets and QSDFT model ( $\text{N}_2$ , carbon equilibrium transition kernel at 77 K based on a slit pore model).

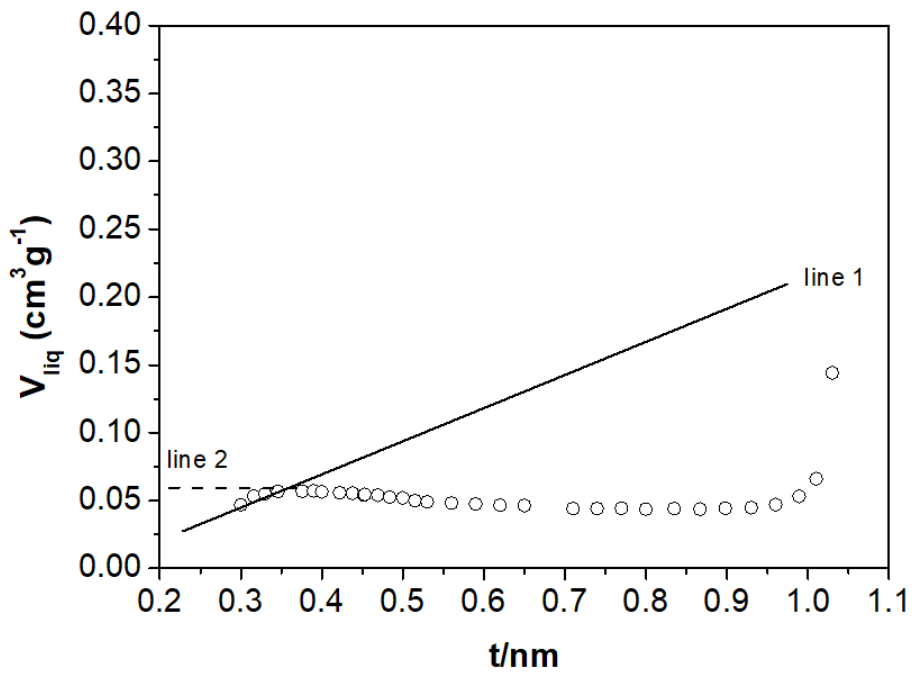

**Figure 2.** t-plot for nitrogen adsorbed at 77 K in carbon nanosheets. Line 1 has a slope corresponding to the total specific surface area of the sample. The intercept of the line2 with the y-axis provides an estimate of the total porous volume.
